# Supplementary material for: The Program for the Control of Visceral Leishmaniasis in Brazil: The Effect of the Systematic Euthanasia of Seropositive Dogs as a Single Control Action in Porteirinha, a Brazilian City with an Intense Transmission of Visceral Leishmaniasis
Source: MDPI journal article supplement (doi:10.3390/pathogens12081060), 2023-08-18
Supplement: s1 [file s1]

## Supplement S1

Figure S1. Partial views of the city of Porteirinha, Minas Gerais state, Brazil. A. Higher region. B.

Lower region

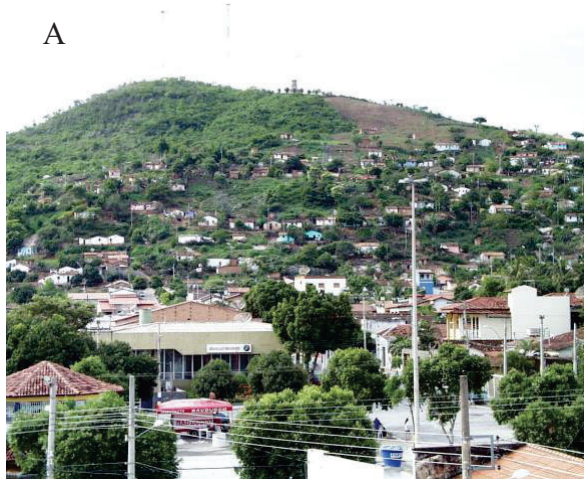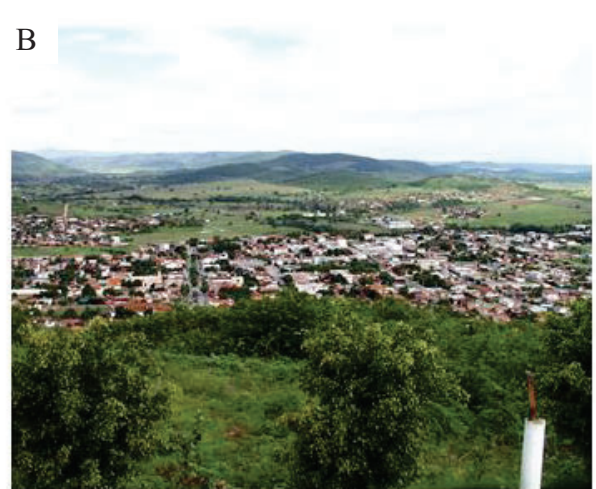

## Supplement S2

Table S1. Relative distribution of coat type and sex associated with the prevalence ratio evaluated in the third canine census survey (CCS<sub>3</sub>). Porteirinha, Minas Gerais state, Brazil.

| Characteristics |                                                                                                              | Relative distribution (%) | No. dogs |          | Prevalence and confidence interval (%) |
|-----------------|--------------------------------------------------------------------------------------------------------------|---------------------------|----------|----------|----------------------------------------|
|                 |                                                                                                              |                           | Examined | Positive |                                        |
| Coat type       | Long-haired                                                                                                  | 18.2                      | 274      | 2        | 0.7 (0.09 – 2.59)                      |
|                 | Short-haired                                                                                                 | 81.8                      | 1230     | 35       | 2.8 (1.93 – 3.83)                      |
|                 | Total                                                                                                        | 100.0                     | 1504     | 37       | 2.46 (1.76 – 3.41)                     |
|                 | Odds ratio= 3.98 (0.93 – 24.09); relative risk 1.02 (1.01 – 1.04); c <sup>2</sup> (Pearson) 4.18, p = 0.0409 |                           |          |          |                                        |
| Gender          | Female                                                                                                       | 40.7                      | 612      | 16       | 2.61 (1.55 – 4.30)                     |
|                 | Male                                                                                                         | 59.3                      | 892      | 21       | 2.35 (1.50 – 3.63)                     |
|                 | Total                                                                                                        | 100.0                     | 1504     | 37       | 2.46 (1.76 – 3.41)                     |
|                 | Odds ratio 1.1 (0.58 – 2.15) ; Yates corrigido c <sup>2</sup> = 0.02, p = 0.880                              |                           |          |          |                                        |
|                 |                                                                                                              |                           |          |          |                                        |

# Supplement S3

Table S2. Data from the 3<sup>rd</sup> canine census survey (CCS<sub>3</sub>) per neighborhood of the urban area of Porteirinha, Minas Gerais state, Brazil. Incidence is expressed by the number of new cases of CVL/canine population exposed in the area x 1000. Prevalence is expressed by the number of cases of CVL/canine population exposed in the area x 1000. CMI stands for Comparative Morbidity Index.

| Neighborhood      | No. dogs |            |     | Seropositive dogs |       |      | Incidence | Prevalence | CMI |
|-------------------|----------|------------|-----|-------------------|-------|------|-----------|------------|-----|
|                   | New      | Introduced | New | Existent          | Total |      |           |            |     |
| Centro            | 21       | 38         | 5   | 6                 | 320   | 15.6 | 1.87      | 0.88       |     |
| Floresta          | 5        | 9          | 0   | 0                 | 43    | 0    | 0         | 0          |     |
| Morada do Parque  | 0        | 3          | 0   | 0                 | 8     | 0    | 0         | 0          |     |
| Ouro Branco       | 12       | 24         | 0   | 0                 | 144   | 0    | 0         | 0          |     |
| Renascença        | 8        | 17         | 0   | 0                 | 124   | 0    | 0         | 0          |     |
| São Judas Tadeu   | 10       | 49         | 9   | 12                | 237   | 38   | 5.06      | 2.16       |     |
| São Sebastião     | 5        | 19         | 0   | 5                 | 97    | 0    | 5.15      | 2.83       |     |
| Vila Kennedy      | 11       | 35         | 0   | 1                 | 149   | 0    | 0.67      | 0.28       |     |
| Vila Mato Verde   | 5        | 8          | 1   | 1                 | 32    | 31.3 | 3.12      | 1.31       |     |
| Vila Serranópolis | 10       | 15         | 3   | 3                 | 136   | 22.1 | 2.2       | 0.88       |     |
| Vila União        | 5        | 15         | 4   | 4                 | 100   | 40   | 4         | 1.71       |     |
| Vila Vitória      | 13       | 12         | 1   | 5                 | 114   | 8.8  | 4.38      | 2.27       |     |
| Total             | 105      | 244        | 23  | 37                | 1504  | 15.2 | 2.46      | -          |     |
